# Supplementary material for: The microbial metabolite p-Cresol induces autistic-like behaviors in mice by remodeling the gut microbiota
Source: PubMed Central journal article supplement (PMC8268286; doi:10.1186/s40168-021-01103-z), 2021-07-08
Supplement: 40168_2021_1103_MOESM2_ESM.pdf [file 40168_2021_1103_MOESM2_ESM.pdf]

## **Additional File 1.**

### **The microbial metabolite *p*-Cresol induces autistic-like behaviors in mice by remodeling the gut microbiota**

Bermudez-Martin, P., Becker, J. A. J., Caramello, N., Fernandez, S. P., Costa-Campos, R., Canaguier, J., Barbosa, S., Martinez-Gili, L., Myridakis, A., Dumas, M.-E., Bruneau, A., Cherbuy, C., Langella, P., Callebert, J., Launay, J.-M., Chabry, J., Barik, J., Le Merrer, J., Glaichenhaus, N., Davidovic, L.

File content:

- Supplementary figures (6)
- Supplementary figures legends (6)
- Supplementary table 5 (Tab. S5)
- Supplementary tables legends (5)

## SUPPLEMENTARY FIGURES

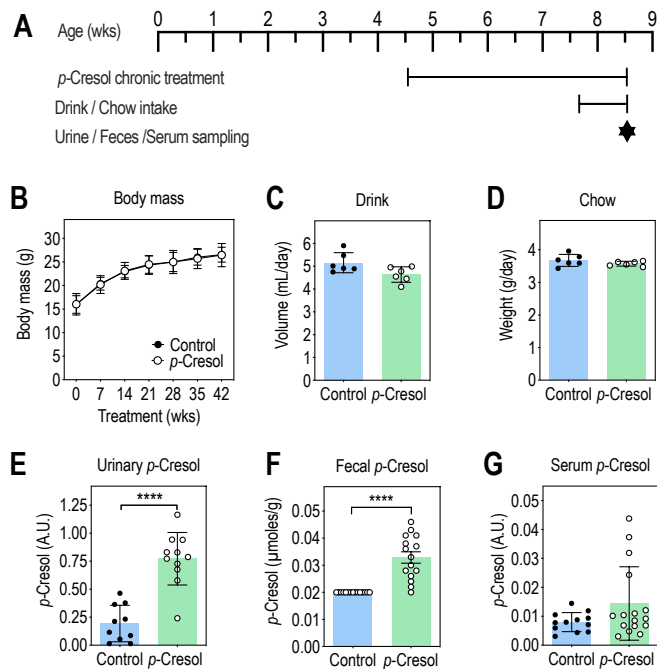

**Fig. S1. *p*-Cresol treatment does not impact general physiological parameters, increases urinary and fecal *p*-Cresol excretion but not its serum levels**

(A) Timeline of the experiment.

(B) Body weight follow-up (n=24/group); 2-way ANOVA:  $p(\text{Treatment})=0.8884$ ,  $p(\text{Time})<0.0001$ ,  $p(\text{Treatment} \times \text{Time})=0.9971$ ; Šidák's post hoc tests for treatment effect:  $p>0.99$ . Note that curves from *p*-Cresol and Control animals overlap.

(C) Drink intake (n=6/group, each point representing the mean consumption per animal in one cage of 5 animals); Mann-Whitney U-test:  $p=0.0931$ .

(D) Food intake (n=6/group, each point representing the mean consumption per animal in one cage of 5 animals); Mann-Whitney U-test:  $p=0.3939$ .

(E) Urinary levels of *p*-Cresol after 4 weeks treatment (n=10 Control, n=11 *p*-Cresol); Mann-Whitney U-test: \*\*\*\* $p<0.0001$ .

(F) Fecal levels of *p*-Cresol after 4 weeks treatment (n=15 Control, n=15 *p*-Cresol); Mann-Whitney U-test: \*\*\*\* $p<0.0001$ .

(G) Serum levels of *p*-Cresol after 4 weeks treatment (n=12 Control, n=16 *p*-Cresol); Mann-Whitney U-test:  $p=0.3238$ .

(B) Data are presented as means  $\pm$  SD.

(C-G) Data are presented as dot-plots featuring means  $\pm$  SD.

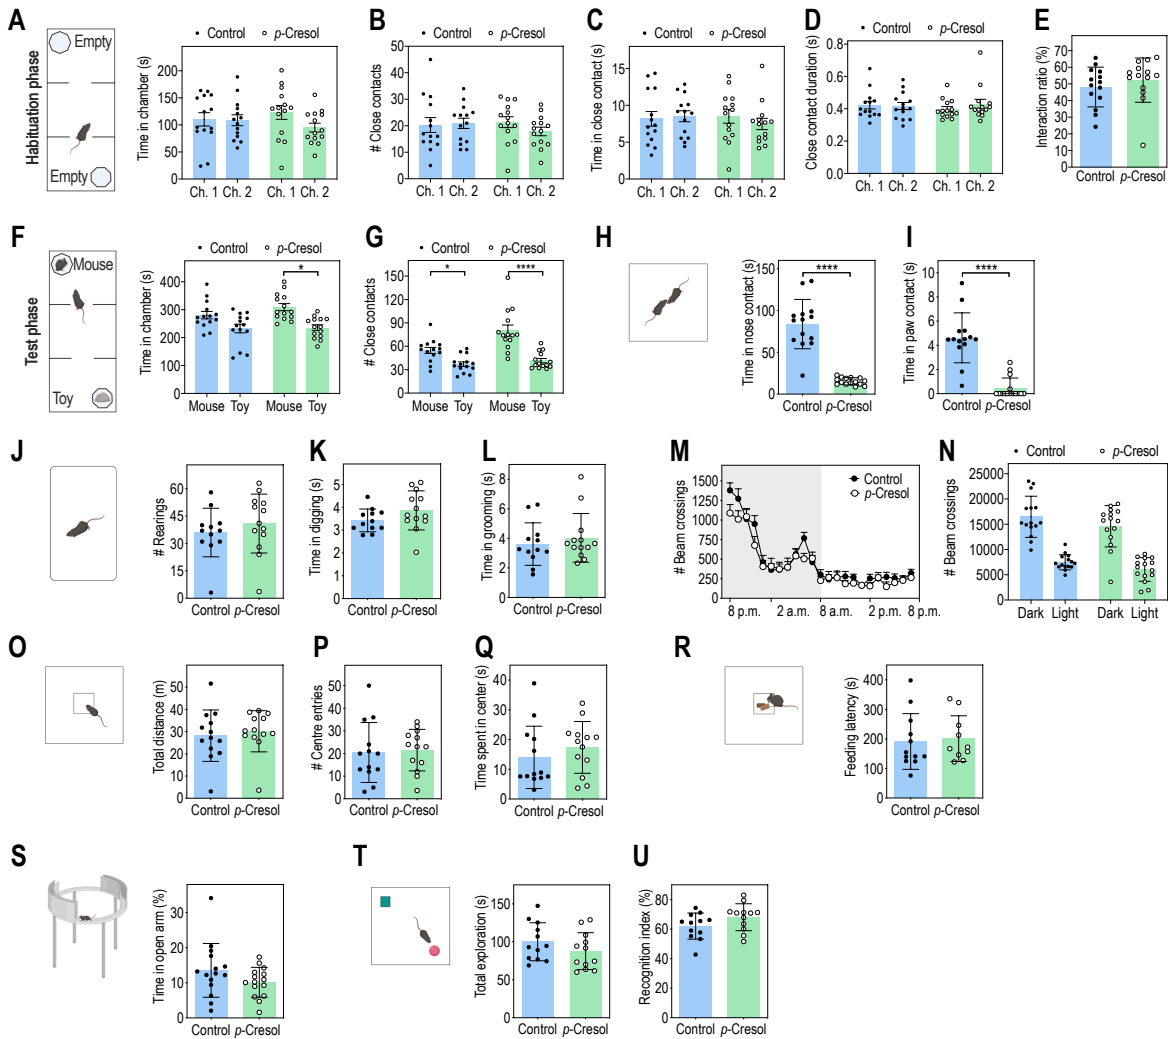

**Fig. S2. *p*-Cresol treatment-induced behavioral alterations: additional parameters in the 3-chamber, dyadic social interactions and stereotypies tests and results from tests assessing locomotor activity, anxiety or cognition (relative to Fig. 1)**

(A-E) Additional parameters during the habituation phase in the 3-chamber test (n=14/group):

(A) Time spent in each chamber; 2-way ANOVA:  $p(\text{Treatment})=0.9498$ ,  $p(\text{Chamber})=0.3018$ ,  $p(\text{Treatment} \times \text{Chamber})=0.3599$ ; Šidák's post hoc tests for chamber effect:  $p>0.05$ .

(B) Number of close contacts with the empty wired cage in each chamber; 2-way ANOVA:  $p(\text{Treatment})=0.6839$ ,  $p(\text{Chamber})=0.4390$ ,  $p(\text{Treatment} \times \text{Chamber})=0.2648$ ; Šidák's post hoc tests for chamber effect:  $p>0.05$ .

(C) Time spent in close contact with the empty cage in each chamber; 2-way ANOVA:  $p(\text{Treatment})=0.7265$ ,  $p(\text{Chamber})=0.6260$ ,  $p(\text{Treatment} \times \text{Chamber})=0.3188$ ; Šidák's post hoc tests for chamber effect:  $p>0.05$ .

(D) Mean duration of each close contact with the empty cage in each chamber; 2-way ANOVA:  $p(\text{Treatment})=0.8330$ ,  $p(\text{Chamber})=0.4995$ ,  $p(\text{Treatment} \times \text{Chamber})=0.3378$ ; Šidák's post hoc tests for chamber effect:  $p>0.05$ .

(E) Interaction ratio (percentage of time spent exploring the wire cage in Chamber 1 relative to the total time spent exploring both wire cages in Chamber 1 and 2); Mann-Whitney U-test:  $p=0.265$ .

(F, G) Additional parameters during the test phase in the 3-chamber test ( $n=14/\text{group}$ ):

(F) Time spent in each chamber containing the mouse interactor or the toy mouse; 2-way ANOVA:  $p(\text{Treatment})=0.0061$ ,  $p(\text{Preference})=0.0019$ ,  $p(\text{Treatment} \times \text{Preference})=0.4797$ ; Šidák's post hoc tests for Mouse vs. Toy preference effect:  $p>0.05$  for Control group, \*  $p<0.05$  for *p*-Cresol group.

(G) Number of close contacts with the mouse interactor or the toy mouse; 2-way ANOVA:  $p(\text{Treatment})=0.0035$ ,  $p(\text{Mouse-Toy})<0.0001$ ,  $p(\text{Treatment} \times \text{Mouse-Toy})=0.0257$ ; Šidák's post hoc tests for Mouse vs. Toy preference effect: \* $p<0.05$ , \*\*\*\* $p<0.0001$ .

(H, I) Additional parameters in the dyadic social interaction test ( $n=14$  Control,  $n=15$  *p*-Cresol):

(H) Total time spent in nose and (I) paw contact; Mann-Whitney U-test: \*\*\*\* $p<0.0001$ .

(J-L) Additional parameters in the motor stereotypies test ( $n=11$  Control,  $n=12$  *p*-Cresol):

(J) Number of rearings; Mann-Whitney U-test:  $p=0.3400$ .

(K) Time spent in digging; Mann-Whitney U-test:  $p=0.4613$ .

(L) Time spent in grooming; Mann-Whitney U-test:  $p=0.1366$ .

(M, N) Locomotor activity in actimetry chambers ( $n=15/\text{group}$ ):

(M) Horizontal activity follow-up over 24 h; 2-way ANOVA:  $p(\text{Treatment})=0.1057$ ,  $p(\text{Time})<0.0001$ ,  $p(\text{Treatment} \times \text{Time})=0.3610$ ; Šidák's post hoc tests for treatment effect:  $p>0.05$ .

(N) Cumulative activity in the dark or light phase; 2-way ANOVA:  $p(\text{Treatment})=0.0909$ ,  $p(\text{Phase})<0.0001$ ,  $p(\text{Treatment} \times \text{Phase})=0.7513$ ; Šidák's post hoc tests for treatment effect:  $p>0.05$ .

(O-Q) Open-field test ( $n=13/\text{group}$ ):

(O) Total distance travelled; Mann-Whitney U-test:  $p=0.3107$ .

(P) Number of centre entries; Mann-Whitney U-test:  $p=0.6047$ .

(Q) Time spent in the center of the area; Mann-Whitney U-test:  $p=0.3292$ .

(R) Novelty suppressed feeding (NSF) test ( $n=12$  Control,  $n=10$  *p*-Cresol): latency to first bite; Mann-Whitney U-test:  $p=0.5707$ .

(S) Zero-maze test ( $n=15/\text{group}$ ): percentage of time spent in open arm; Mann-Whitney U-test:  $p=0.1485$ .

(T, U) Novel object recognition (NOR) test ( $n=12/\text{group}$ ):

(T) Total time spent exploring the objects during the test phase; Mann-Whitney U-test:  $p=0.1978$ .

(U) Recognition index (percentage of time spent exploring the novel object relative to the total time spent exploring the old and new objects); Mann-Whitney U-test:  $p=0.1135$ .

(A-L, N-U) Data are presented as dot-plots featuring means  $\pm$  SD.

(M) Data are shown as means  $\pm$  SD.

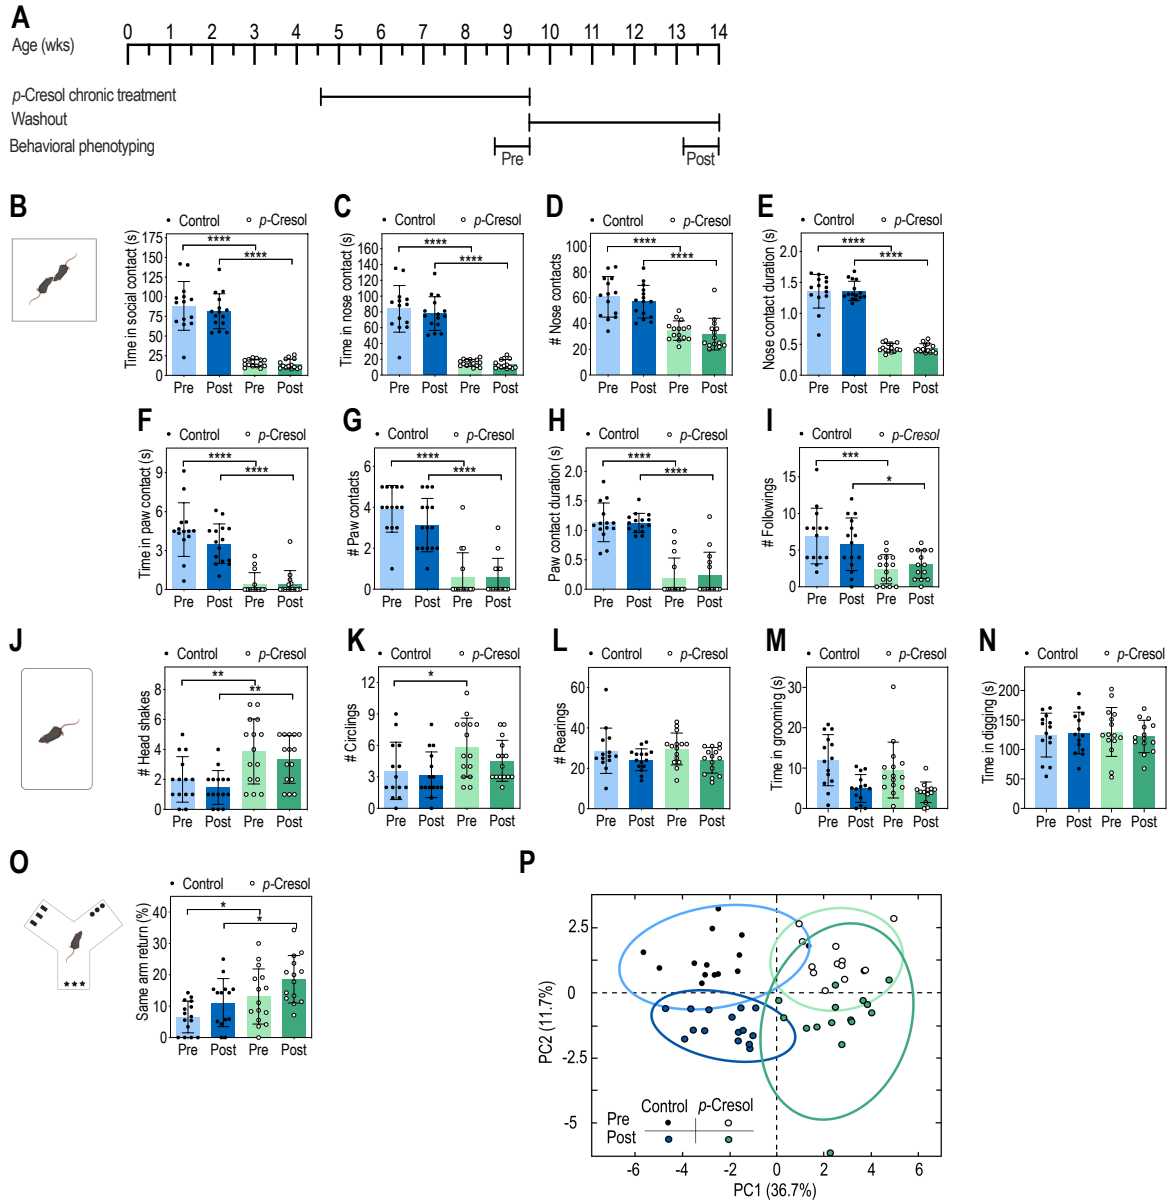

**Fig. S3. Autistic-like behaviors persist after discontinuation of *p*-Cresol for 4 weeks**

(A) Timeline of the experiment.

(B-I) Dyadic social interaction test (n=14 Control, n=15 *p*-Cresol):

(B) Total time spent in social contact; 2-way ANOVA:  $p(\text{Treatment}) < 0.0001$ ,  $p(\text{Washout}) = 0.4194$ ,  $p(\text{Treatment} \times \text{Washout}) = 0.5883$ ; Šidák's post hoc tests for treatment effect: \*\*\*\* $p < 0.0001$ .

(C) Time spent in nose contact; 2-way ANOVA:  $p(\text{Treatment}) < 0.0001$ ,  $p(\text{Washout}) = 0.4525$ ,  $p(\text{Treatment} \times \text{Washout}) = 0.6450$ ; Šidák's post hoc tests for treatment effect: \*\*\*\* $p < 0.0001$ .

(D) Number of nose contacts; 2-way ANOVA:  $p(\text{Treatment}) < 0.0001$ ,  $p(\text{Washout}) = 0.3237$ ,  $p(\text{Treatment} \times \text{Washout}) = 0.8660$ ; Šidák's post hoc tests for treatment effect: \*\*\*\* $p < 0.0001$ .

(E) Mean duration of each nose contact; 2-way ANOVA:  $p(\text{Treatment}) < 0.0001$ ,  $p(\text{Washout}) = 0.9807$ ,  $p(\text{Treatment} \times \text{Washout}) = 0.8922$ ; Šidák's post hoc tests for treatment effect: \*\*\*\* $p < 0.0001$ .

(F) Time spent in paw contact; 2-way ANOVA:  $p(\text{Treatment}) < 0.0001$ ,  $p(\text{Washout}) = 0.1638$ ,  $p(\text{Treatment} \times \text{Washout}) = 0.1465$ ; Šidák's post hoc tests for treatment effect: \*\*\*\* $p < 0.0001$ .

(G) Number of paw contacts; 2-way ANOVA:  $p(\text{Treatment}) < 0.0001$ ,  $p(\text{Washout}) = 0.1793$ ,  $p(\text{Treatment} \times \text{Washout}) = 0.2109$ ; Šidák's post hoc tests for treatment effect: \*\*\*\* $p < 0.0001$ .

(H) Mean duration of each paw contact; 2-way ANOVA:  $p(\text{Treatment}) < 0.0001$ ,  $p(\text{Washout}) = 0.7906$ ,  $p(\text{Treatment} \times \text{Washout}) = 0.6926$ ; Šidák's post hoc tests for treatment effect: \*\*\*\* $p < 0.0001$ .

(I) Number of followings; 2-way ANOVA:  $p(\text{Treatment}) < 0.0001$ ,  $p(\text{Washout}) = 0.7697$ ,  $p(\text{Treatment} \times \text{Washout}) = 0.2517$ ; Šidák's post hoc tests for treatment effect: \*\*\* $p < 0.001$ , \* $p < 0.05$ .

(J-N) Motor stereotypies (n=14 Control; n=15 *p*-Cresol):

(J) Number of head shakes; 2-way ANOVA:  $p(\text{Treatment}) < 0.0001$ ,  $p(\text{Washout}) = 0.2185$ ,  $p(\text{Treatment} \times \text{Washout}) > 0.9999$ ; Šidák's post hoc tests for treatment effect: \*\* $p < 0.01$ .

(K) Number of circling events; 2-way ANOVA:  $p(\text{Treatment}) = 0.0051$ ,  $p(\text{Washout}) = 0.2605$ ,  $p(\text{Treatment} \times \text{Washout}) = 0.5796$ ; Šidák's post hoc tests for treatment effect: \* $p < 0.05$  for pre-washout groups,  $p > 0.05$  for post-washout groups.

(L) Number of rearings; 2-way ANOVA:  $p(\text{Treatment}) = 0.8820$ ,  $p(\text{Washout}) = 0.0188$ ,  $p(\text{Treatment} \times \text{Washout}) = 0.7823$ ; Šidák's post hoc tests for treatment effect:  $p > 0.05$ .

(M) Time spent in grooming; 2-way ANOVA:  $p(\text{Treatment}) = 0.2308$ ,  $p(\text{Washout}) < 0.0001$ ,  $p(\text{Treatment} \times \text{Washout}) = 0.5929$ ; Šidák's post hoc tests for treatment effect:  $p > 0.05$ .

(N) Time spent in digging; 2-way ANOVA:  $p(\text{Treatment}) = 0.9763$ ,  $p(\text{Washout}) = 0.8304$ ,  $p(\text{Treatment} \times \text{Washout}) = 0.5579$ ; Šidák's post hoc tests for treatment effect:  $p > 0.05$ .

(O) Y-maze spontaneous alternations test: percentage of same-arm returns (n=15 Control, n=14 *p*-Cresol): 2-way ANOVA:  $p(\text{Treatment}) = 0.0007$ ,  $p(\text{Washout}) = 0.0120$ ,  $p(\text{Treatment} \times \text{Washout}) = 0.8179$ ; Šidák's post hoc tests for treatment effect: \* $p < 0.05$ .

(P) PCA plots of behavioral scores recorded in the dyadic social interaction test and direct monitoring of motor stereotypies (Fig. S3B-N); ellipses of the 95% confidence intervals are indicated for each group (n=14 Control; n=15 *p*-Cresol).

(B-O) Data are presented as dot-plots featuring means  $\pm$  SD.

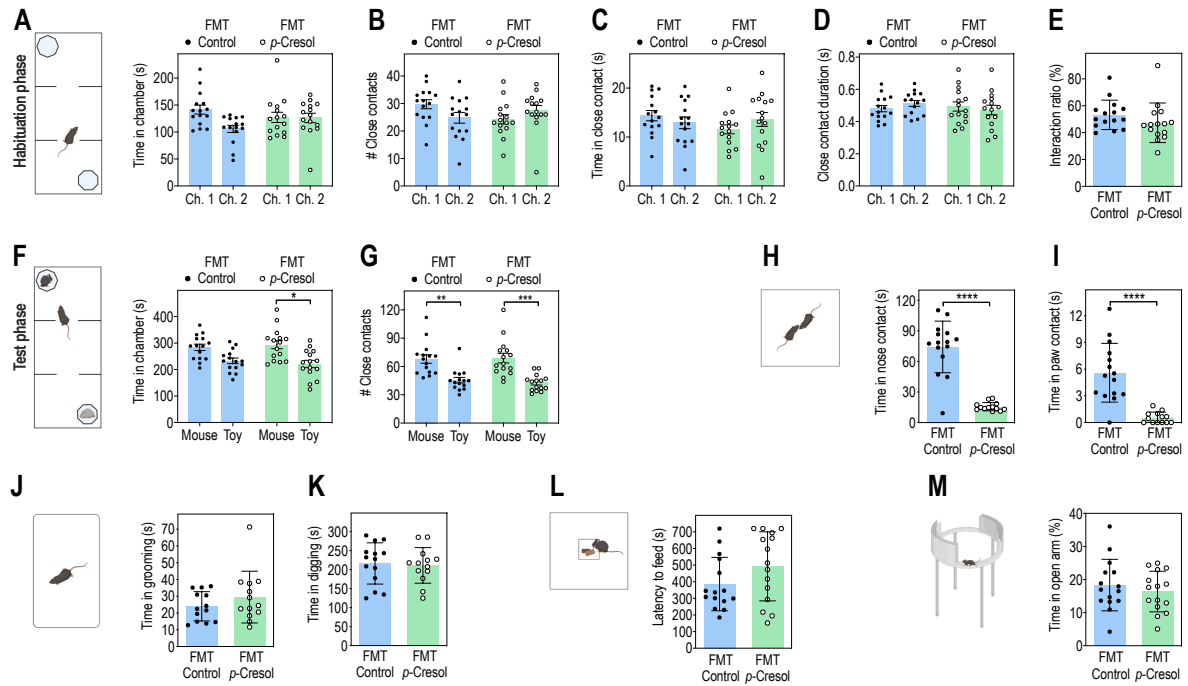

**Fig. S4. Additional behavioral parameters for the 3-chamber, dyadic social interactions, motor stereotypes tests and anxiety in  $FMT^{Control}$  and  $FMT^{p-Cresol}$  mice (relative to Fig. 4)**

(A-E) Additional parameters during the habituation phase in the 3-chamber test post- $FMT^{Control}$  and  $FMT^{p-Cresol}$  ( $n=15/group$ ):

(A) Time spent in each chamber; 2-way ANOVA:  $p(FMT)=0.2314$ ,  $p(Chamber)=0.1231$ ,  $p(FMT \times Chamber)=0.1453$ ; Šidák's post hoc tests for chamber effect:  $p>0.05$ .

(B) Number of close contacts with the empty cage in each chamber; 2-way ANOVA:  $p(FMT)=0.3182$ ,  $p(Chamber)=0.6725$ ,  $p(FMT \times Chamber)=0.0658$ ; Šidák's post hoc tests for chamber effect:  $p>0.05$ .

(C) Time in close contact with the empty cage in each chamber; 2-way ANOVA:  $p(FMT)=0.4025$ ,  $p(Chamber)=0.795$ ,  $p(FMT \times Chamber)=0.1127$ ; Šidák's post hoc tests for chamber effect:  $p>0.05$ .

(D) Mean duration of each close contact with the empty cage in each chamber; 2-way ANOVA:  $p(FMT)=0.6674$ ,  $p(Chamber)=0.2078$ ,  $p(FMT \times Chamber)=0.281$ ; Šidák's post hoc tests for chamber effect:  $p>0.05$ .

(E) Interaction ratio (percentage of time spent exploring the wire cage in Chamber 1 relative to the total time spent exploring both wire cages in Chamber 1 and 2); Mann-Whitney U-test:  $p=0.081$ .

(F, G) Additional parameters during the test phase in the 3-chamber test post- $FMT^{Control}$  and  $FMT^{p-Cresol}$  ( $n=13/group$ ):

(F) Time spent in each chamber containing the mouse interactor or the toy mouse; 2-way ANOVA:  $p(FMT)=0.8256$ ,  $p(Preference)<0.002$ ,  $p(FMT \times Preference)=0.5436$ ; Šidák's post hoc tests for Mouse vs. Toy preference:  $p>0.05$  for  $FMT^{Control}$  group,  $*p<0.05$  for  $FMT^{p-Cresol}$  group.

(G) Number of close contacts with the mouse interactor or the toy mouse; 2-way ANOVA:  $p(\text{FMT})=0.7887$ ,  $p(\text{Preference})<0.0001$ ,  $p(\text{FMT} \times \text{Preference})=0.6501$ ; Šidák's post hoc tests for Mouse vs. Toy preference:  $**p<0.01$ ,  $***p<0.001$ .

(H, I) Dyadic social interaction test (n=15 animals/group):

(H) Total time spent in nose contact; Mann-Whitney U-test:  $****p<0.0001$

(I) Total time spent in paw contact; Mann-Whitney U-test:  $****p<0.0001$

(J, K) Motor stereotypies (n= 14 FMT<sup>Control</sup>, n=13 FMT<sup>p-Cresol</sup>):

(J) Time spent in grooming; Mann-Whitney U-test:  $p=0.3358$ .

(K) Time spent in digging; Mann-Whitney U-test:  $p=0.5502$ .

(L) NSF test (n=15 animals/group): latency to first bite; Mann-Whitney U-test:  $p=0.164$ .

(M) Zero-maze test (n=15 animals/group): percentage of time spent in open arm; Mann-Whitney U-test:  $p=0.653$ .

Data are presented as dot-plots featuring means  $\pm$  SD.



**A**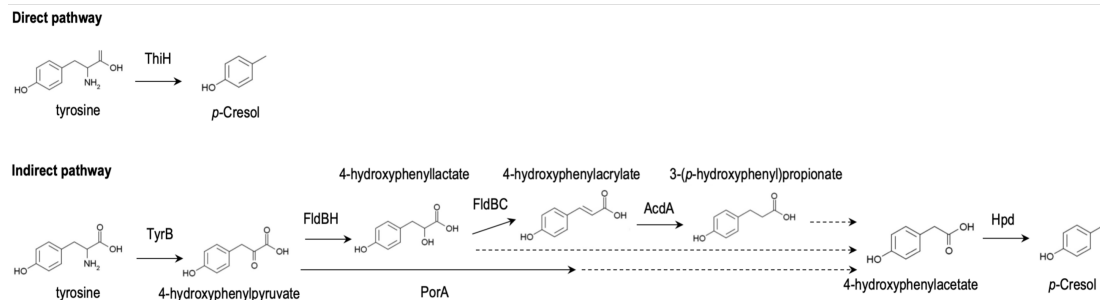**B**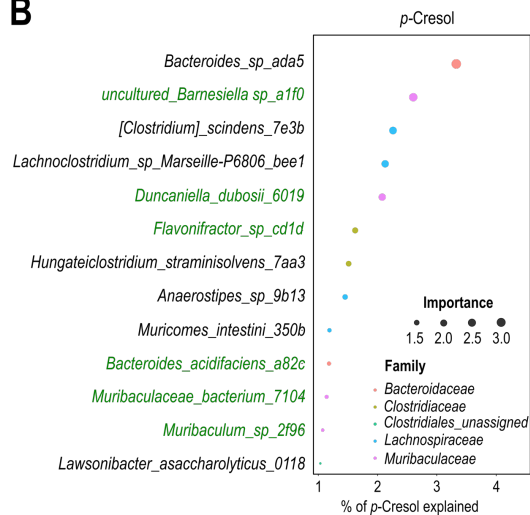**Fig. S5. *p*-Cresol microbial biosynthetic pathways (relative to Fig. 5)**

(A) Metabolic pathways from tyrosine to *p*-Cresol. The direct pathway uses thiazole synthase H (ThiH), while the indirect pathway uses several intermediate enzymes: tyrosine aminotransferase B (TyrB), phenyllactate dehydrogenase (FldH), phenyllactate dehydratase (FldBC), acyl-CoA dehydrogenase (AcdA), hydroxyarylic acid decarboxylase (Had), pyruvate-ferredoxin oxidoreductase A (PorA) and hydroxyphenylacetate decarboxylase (Hpd). Dashed lines indicate enzymes not yet identified/characterized. Adapted from [28].

(B) Microbial composition prediction of fecal *p*-Cresol in FMT<sup>Control</sup> and FMT<sup>*p*-Cresol</sup> mice (n=8 FMT<sup>Control</sup>, n=12 FMT<sup>*p*-Cresol</sup>). ASV best predicting fecal *p*-Cresol as identified by Random Forest analysis. Only ASV contributing >1% accuracy in fecal *p*-Cresol concentration prediction are presented. ASV related to ASV/species increased in FMT<sup>*p*-Cresol</sup> mice as determined by ANCOM analysis are labeled in green.

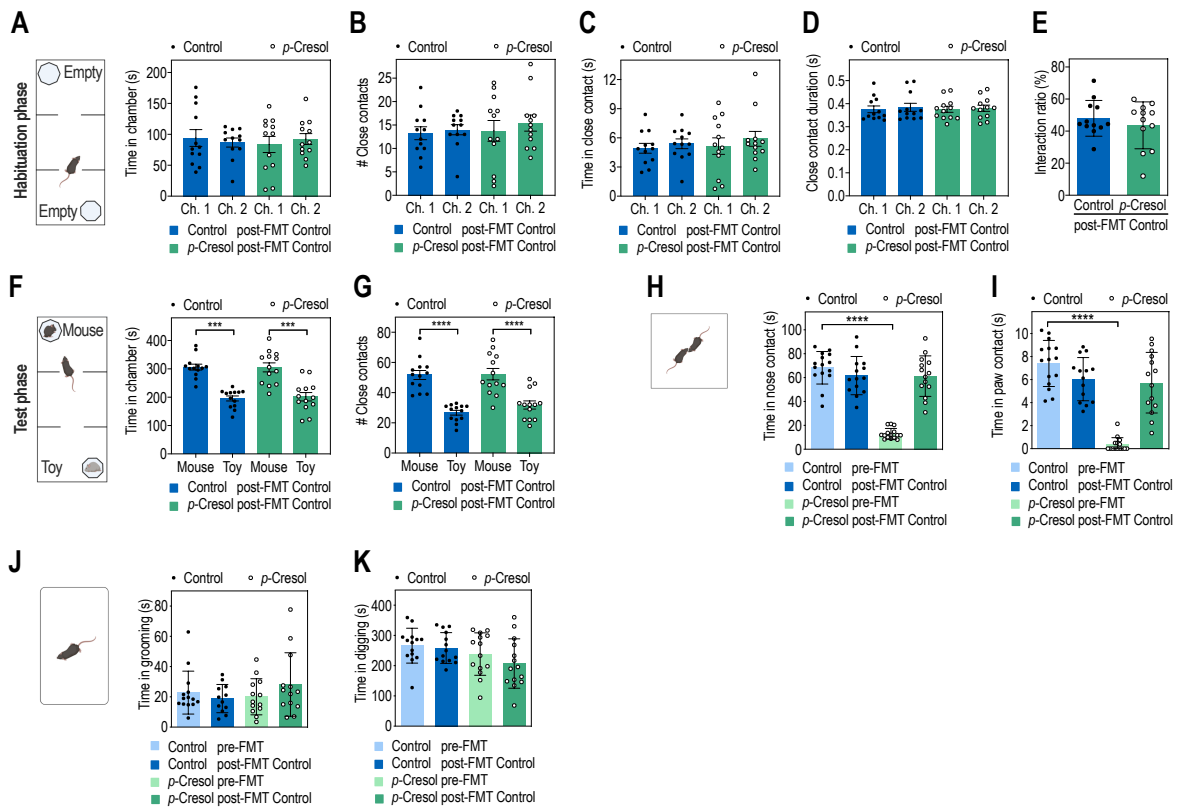

**Fig. S6. FMT experiments from control donors (FMT<sup>Control</sup>) to Control or p-Cresol-treated recipient mice: additional behavioral parameters in the 3-chamber, dyadic social interactions and stereotypes tests (relative to Fig. 6)**

(A-E) Additional parameters during the habituation phase in the 3-chamber test post-FMT<sup>Control</sup> (n=13/group):

(A) Time spent in each chamber; 2-way ANOVA:  $p(\text{Treatment})=0.8296$ ,  $p(\text{Chamber})=0.9514$ ,  $p(\text{Treatment} \times \text{Chamber})=0.4749$ ; Šidák's post hoc tests for chamber preference effect:  $p>0.05$ .

(B) Number of close contacts with the empty cage in each chamber; 2-way ANOVA:  $p(\text{Treatment})=0.6456$ ,  $p(\text{Chamber})=0.2947$ ,  $p(\text{Treatment} \times \text{Chamber})=0.6878$ ; Šidák's post hoc tests for chamber preference effect:  $p>0.05$ .

(C) Time in close contact with the empty cage in each chamber; 2-way ANOVA:  $p(\text{Treatment})=0.6728$ ,  $p(\text{Chamber})=0.1662$ ,  $p(\text{Treatment} \times \text{Chamber})=0.7417$ ; Šidák's post hoc tests for chamber preference effect:  $p>0.05$ .

(D) Mean duration of each close contact with the empty cage in each chamber; 2-way ANOVA:  $p(\text{Treatment})=0.9252$ ,  $p(\text{Chamber})=0.2163$ ,  $p(\text{Treatment} \times \text{Chamber})=0.7061$ ; Šidák's post hoc tests for chamber preference effect:  $p>0.05$ .

(E) Interaction ratio (percentage of time spent exploring the wire cage in Chamber 1 relative to the total time spent exploring both wire cages in Chamber 1 and 2); Mann-Whitney U-test:  $p=0.755$ .

(F,G) Additional parameters during the test phase in the 3-chamber test post-FMT<sup>Control</sup> ( $n=13$ /group):

(F) Time spent in each chamber containing the mouse interactor or the toy mouse; 2-way ANOVA:  $p(\text{Treatment})=0.7588$ ,  $p(\text{Preference}) < 0.0001$ ,  $p(\text{Treatment} \times \text{Preference})=0.8356$ ; Šidák's post hoc tests for Mouse vs. Toy preference:  $***p < 0.001$ .

(G) Number of close contacts with the mouse interactor or the toy mouse; 2-way ANOVA:  $p(\text{Treatment})=0.3399$ ,  $p(\text{Preference}) < 0.0001$ ,  $p(\text{Treatment} \times \text{Preference})=0.4225$ ; Šidák's post hoc tests for Mouse vs. Toy preference:  $****p < 0.0001$ .

(H, I) Additional parameters in the dyadic social interaction test pre- and post-FMT<sup>Control</sup> ( $n=15$ /group pre-FMT,  $n=14$ /group post-FMT):

(H) Time spent in nose contact; 2-way ANOVA:  $p(\text{Treatment}) < 0.0001$ ,  $p(\text{FMT}^{\text{Control}}) < 0.0001$ ,  $p(\text{Treatment} \times \text{FMT}^{\text{Control}}) < 0.0001$ ; Šidák's post hoc tests for treatment effect:  $****p < 0.0001$  for pre-FMT<sup>Control</sup> groups,  $p > 0.05$  for post-FMT<sup>Control</sup> groups.

(I) Time spent in paw contact; 2-way ANOVA:  $p(\text{Treatment}) < 0.0001$ ,  $p(\text{FMT}^{\text{Control}})=0.0002$ ,  $p(\text{Treatment} \times \text{FMT}^{\text{Control}}) < 0.0001$ ; Šidák's post hoc tests for treatment effect:  $****p < 0.0001$  for pre-FMT<sup>Control</sup> groups,  $p > 0.05$  for post-FMT<sup>Control</sup> groups.

(J, K) Additional parameters in the motor stereotypies test pre- and post-FMT<sup>Control</sup> ( $n=14$ /group pre-FMT,  $n=14$ /group post-FMT):

(J) Time spent in grooming; 2-way ANOVA:  $p(\text{Treatment})=0.7605$ ,  $p(\text{FMT}^{\text{Control}})=0.2801$ ,  $p(\text{Treatment} \times \text{FMT}^{\text{Control}})=0.9682$ ; Šidák's post hoc tests for treatment effect:  $p > 0.05$ .

(K) Time spent in digging; 2-way ANOVA:  $p(\text{Treatment})=0.0295$ ,  $p(\text{FMT}^{\text{Control}})=0.2740$ ,  $p(\text{Treatment} \times \text{FMT}^{\text{Control}})=0.5058$ ; Šidák's post hoc tests for treatment effect:  $p > 0.05$ .

Data are presented as dot-plots featuring means  $\pm$  SD.

## SUPPLEMENTARY TABLES

**Tab. S1. ANCOM analysis: significant microbial features (from ASV to phylum) discriminating *p*-Cresol from Control microbiota (relative to Fig. 3)**

Taxonomic information regarding the identified bacterial features, corresponding centered log ratio (CLR), Wald's test W statistic as determined by ANCOM analysis of bacterial composition based on 16S rRNA sequencing are indicated. ASV, amplicon sequence variant (n=30 Control, n=30 *p*-Cresol).

*Available as Excel file, Additional file 2.*

**Tab. S2. ANCOM analysis: significant microbial features (from ASV to phylum) discriminating FMT<sup>Control</sup> from FMT<sup>*p*-Cresol</sup> mice, 3 weeks post-FMT (relative to Fig. 5)**

Taxonomic information regarding the identified bacterial features, corresponding centered log ratio (CLR), Wald's test W statistic as determined by ANCOM analysis of bacterial composition based on 16S rRNA sequencing are indicated. ASV, amplicon sequence variant (n=15 FMT<sup>Control</sup>, n=15 FMT<sup>*p*-Cresol</sup>).

*Available as Excel file, Additional file 3.*

**Tab. S3. Output of blast sequence analysis for ThiH, Tyr and HpdA/B/C enzymes involved in *p*-Cresol synthesis (relative to Tab. 1)**

*Available as Excel file, Additional file 4.*

**Tab. S4. Details on ASV sequences and taxonomic affiliation.** Name and sequence of each of the ASV identified in the dataset, as well as the taxon identity (txid) and homology scores (% of identity, bitscore, e-value) for the nearest homology match.

*Available as Excel file, Additional file 5.*

**Tab. S5: Recapitulation of the behavioral tests performed in the course of the study (✓ assessed, × non-assessed).**

|                             |                            | <i>p</i> -Cresol           | <i>p</i> -Cresol/<br>washout | FMT <sup><i>p</i>-Cresol</sup><br>FMT <sup>Control</sup> | FMT <sup>Control</sup>     |
|-----------------------------|----------------------------|----------------------------|------------------------------|----------------------------------------------------------|----------------------------|
| <b>Behavioral dimension</b> | <b>Test</b>                | <b>Fig. 1,<br/>Fig. S2</b> | <b>Fig. S3</b>               | <b>Fig. 4,<br/>Fig. S4</b>                               | <b>Fig. 6,<br/>Fig. S6</b> |
| <b>Social behavior</b>      | Dyadic social interaction  | ✓                          | ✓                            | ✓                                                        | ✓                          |
|                             | 3-chamber test             | ✓                          | ×                            | ✓                                                        | ✓                          |
| <b>Stereotypies</b>         | Motor stereotypies         | ✓                          | ✓                            | ✓                                                        | ✓                          |
|                             | Marble burying test        | ✓                          | ×                            | ×                                                        | ×                          |
|                             | Y-maze                     | ✓                          | ✓                            | ×                                                        | ×                          |
| <b>Activity</b>             | Actimetry                  | ✓                          | ×                            | ×                                                        | ×                          |
| <b>Anxiety</b>              | Openfield                  | ✓                          | ×                            | ×                                                        | ×                          |
|                             | Novelty suppressed feeding | ✓                          | ×                            | ✓                                                        | ×                          |
|                             | Zero-maze                  | ✓                          | ×                            | ✓                                                        | ×                          |
| <b>Cognition</b>            | Novel object recognition   | ✓                          | ×                            | ×                                                        | ×                          |

**Tab. S6. Compilation of ANOVA statistics for behavioral data analyses and PERMANOVA statistics for 16S rRNA gene sequencing-based richness and diversity analyses**

*Available as Excel file, Additional file 6.*
